# Supplementary material
Source: PubMed Central journal article supplement (PMC6222207)
Supplement: zjb999094917s1.pdf [file zjb999094917s1.pdf]

## SUPPLEMENTARY MATERIAL

### **Multiple Flagellin Proteins Have Distinct and Synergistic Roles in *Agrobacterium tumefaciens* Motility**

Bitan Mohari, Melene A Thompson, Jonathan C Trinidad, Sima Setayeshgar  
and Clay Fuqua

Running title: Multiple flagellins of *A. tumefaciens*

- 1) Supplementary Figures – S1-S7
- 2) Supplementary Figure Legends
- 3) Supplementary Tables – S1-S4
- 4) Supplementary References



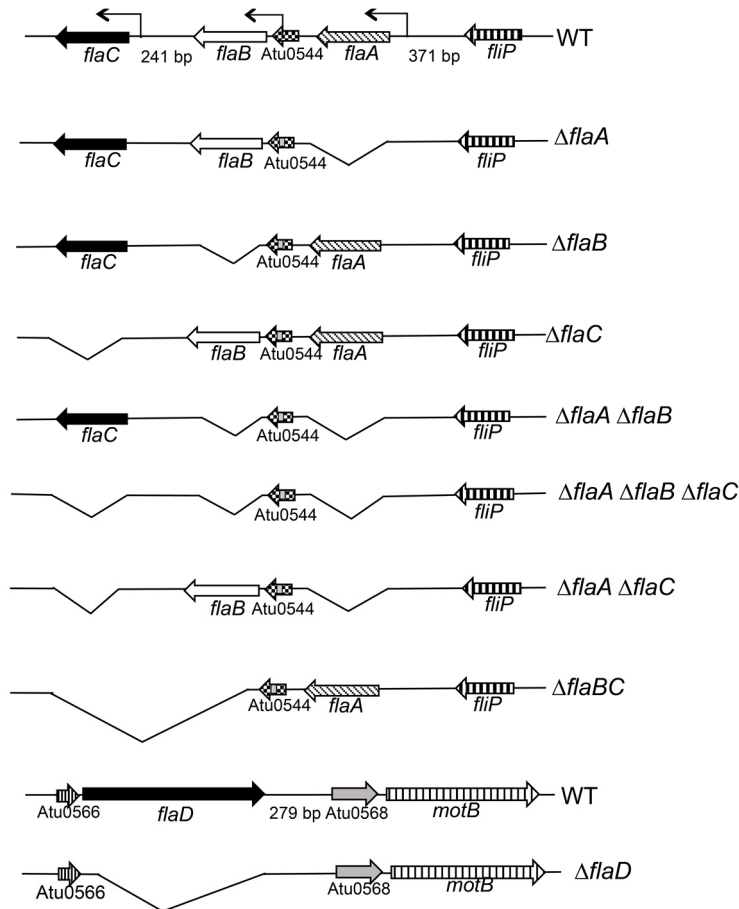

**Figure S2.** Construction of flagellin deletion mutants.

(A) Mutants were generated via allelic replacement (detailed in Materials and Methods) keeping in consideration that the existing genes are intact. The wild type shows the arrangement of three flagellin genes with their transcriptional start sites marked by arrows that has been mapped by Deakin et al. 1999. The bottom panels show the sequential deletion of genes. (B) *flaD* is located 15 kb away from *flaABC* in opposite orientation and its transcription start site has not been mapped. *flaD* deletion mutant was then combined with other flagellin mutants using the same strategy, in order to generate all combinations of flagellin mutants. FlaA is 306 aa, FlaB is 320 aa, FlaC is 313 aa and FlaD is 430 aa long.

A

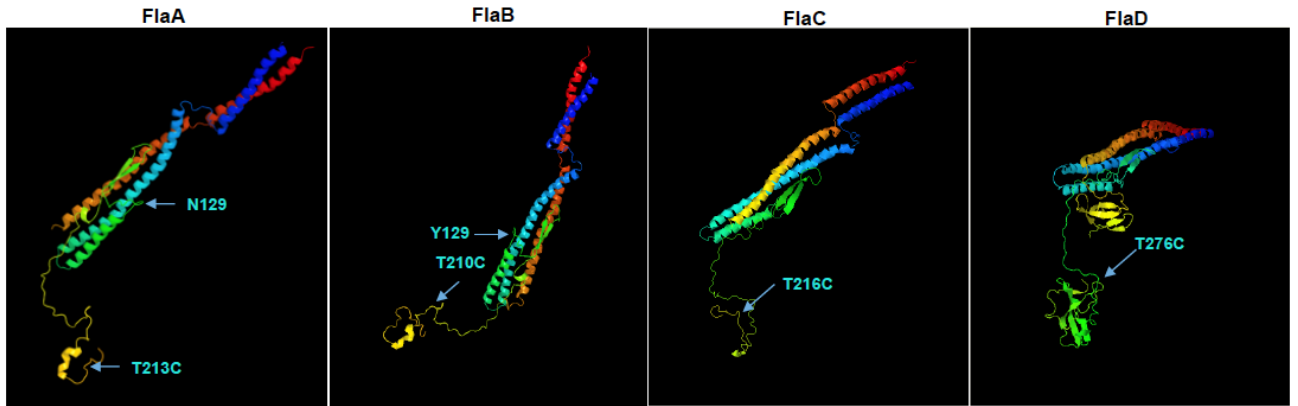

B

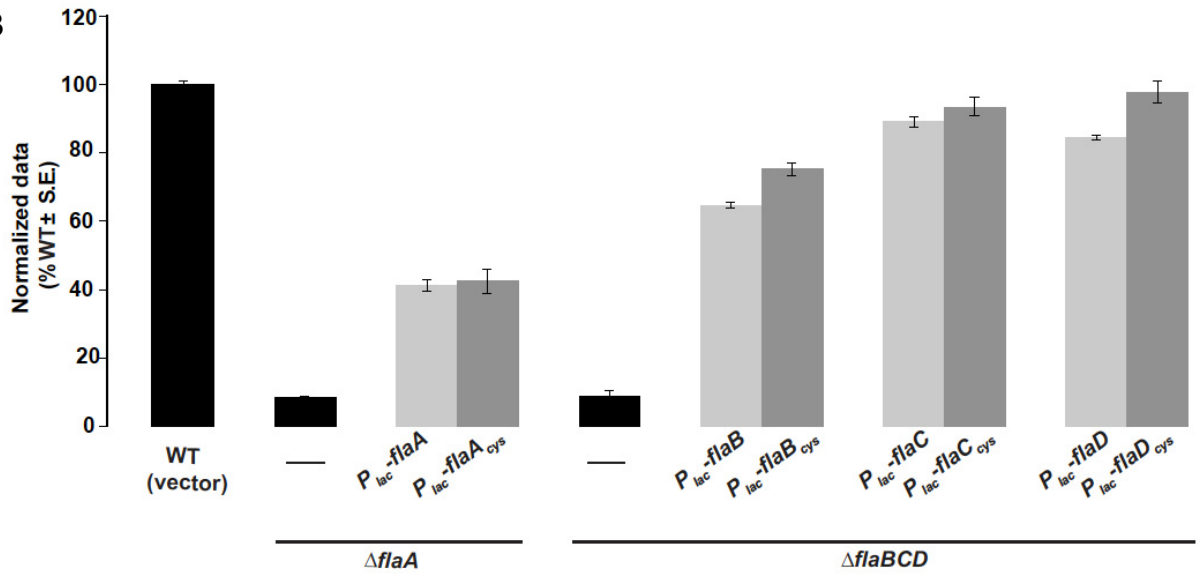

C

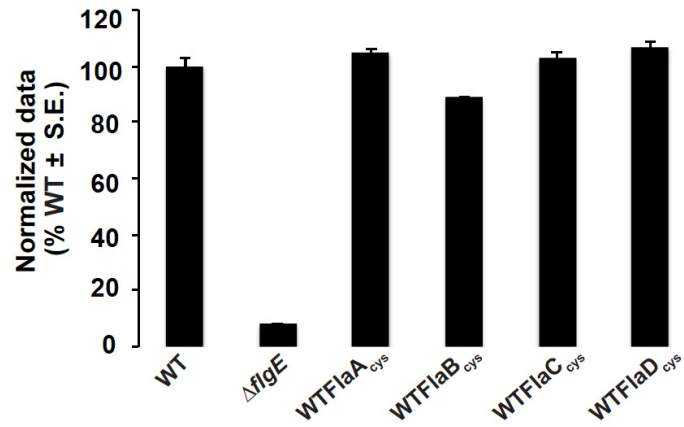

### Figure S3. Flagellin mutants with introduced cysteine residues

(A) Phyre structural analysis of FlaA, FlaB, FlaC and FlaD. A structural model for all flagellins based on the *Salmonella* FliC flagellin (PDB 3A5ZX) structure using Phyre2. Images are rainbow colored N → C terminus. Threonine residues mutated to cysteine via site-specific mutagenesis are mapped on the flagellin structures (indicated by arrow). FlaAN129 and FlaBY129 residues are also indicated. (B) Complementation phenotype of all  $\Delta flaBCD$  mutants with plasmid borne cysteine knock-in constructs of flagellins. Swim ring formation after 7 days in the  $\Delta flaA$  or  $\Delta flaBCD$  mutants with plasmid borne expression of either *flaA*<sub>Cys</sub> or *flaB*<sub>Cys</sub> or *flaC*<sub>Cys</sub> expressed from *P<sub>lac</sub>*. These constructs were all induced with 400  $\mu$ m IPTG (dark grey bars). The complementation by either *flaA* or *flaB* or *flaC* are shown for comparison (light grey bars). Wild type and other controls:  $\Delta flaA$  and  $\Delta flaBCD$  are shown in black bars. *flaA*<sub>Cys</sub> refers to FlaAT213C, *flaB*<sub>Cys</sub> refers to FlaBT190C, *flaC*<sub>Cys</sub> refers to FlaCT216C and *flaD*<sub>Cys</sub> refers to FlaDT276C. Data is normalized to wild type. (C) Swim phenotype for cells having chromosomal copies of cysteine knock in flagellins. Swim ring diameter data after 7 days showing the swimming proficiency of strains that are otherwise wild type but have cysteine knock in flagellins: FlaA<sub>Cys</sub> or FlaB<sub>Cys</sub> or FlaC<sub>Cys</sub> or FlaD<sub>Cys</sub> as indicated. Values are the averages for three swim plates per strain, with error bars in SEM.

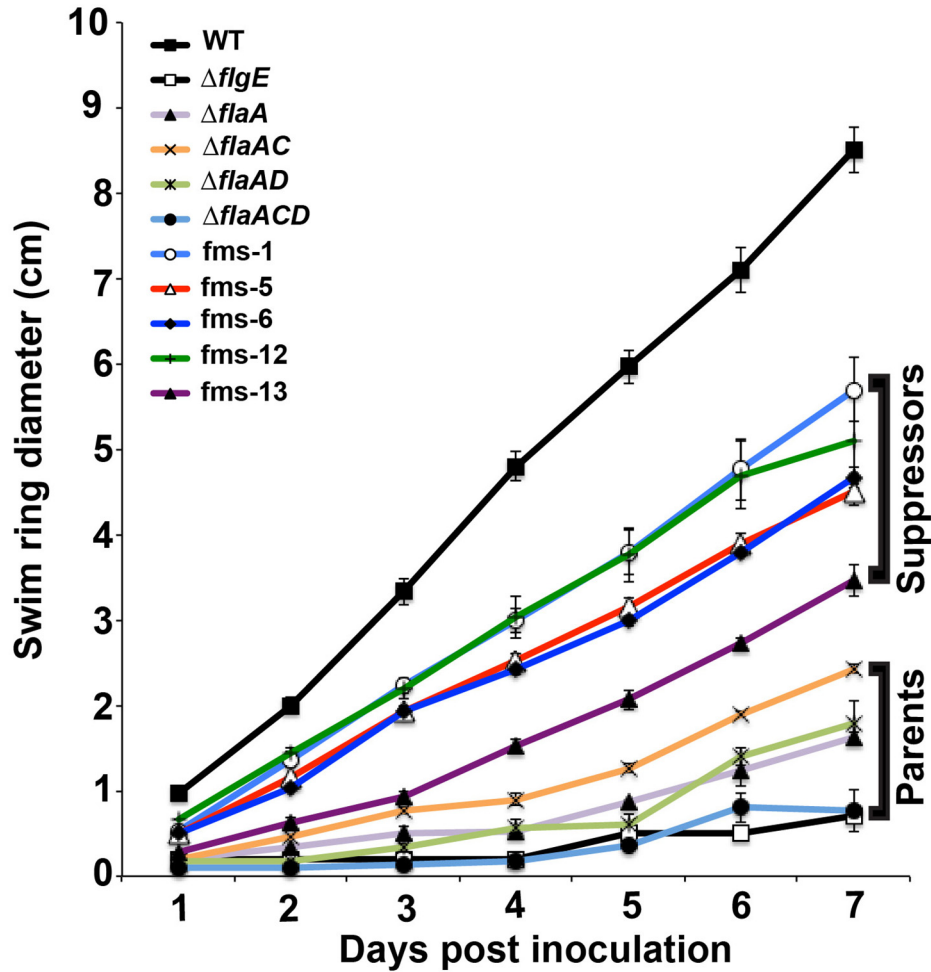

**Figure S4.** Motility agar migration of *fms* mutants.

Quantified swim ring diameters of WT and  $\Delta flgE$  (black lines), the parent mutants:  $\Delta flaA$  (light purple),  $\Delta flaAC$  (orange),  $\Delta flaAD$  (light green),  $\Delta flaACD$  (light blue) and the suppressor mutants: *fms*-1 (dark blue1), *fms*-5 (red), *fms*-6 (dark blue2), *fms*-12 (dark green) and *fms*-13 (dark purple). Open marker styles are for parent mutants and filled marker styles are for suppressors. Values are the averages for three swim plates per strain. Error bars show SEM. Parentheses indicate parent and suppressor groups.

```

SciPC. crescentus MLQQQRTNSRGEKYVIGPTGAPLTLADLPPAETQRWVIRRKAEVVAAVRGGLLSLDEACD 60
SciPA. tumefaciens ---MTEMIRPRVKYVIGPDGSPLTIADLPPANTRRWVIRRKAEVVAAVRGGLLSLEEACE 57
.          ***** *:***:*****:*:*****:*****:*****:*****:*****:
SciPC. crescentus RYKLTNDEFLEWQSSIDRHGLAGLRTRTRIQQYR- 93
SciPA. tumefaciens RYTLTVEEFLSWQSSISDHGLAGLRTRTRIQQYRH 91
**.* ** :*****.***.* *****
L61F          G77R

```

**Figure S5.** Amino acid sequence alignments of SciP.

Pairwise alignments were performed with Clustal Omega. Asterisks, colons and semicolons mark residues that are conserved, highly similar, and weakly similar, respectively. The alignment of *A. tumefaciens* Atu2430 and *C. crescentus* SciP is shown. Gray shaded region indicates the conserved helix turn helix motif and the red boxes indicate conserved residues found to be mutated in suppressor mutants.

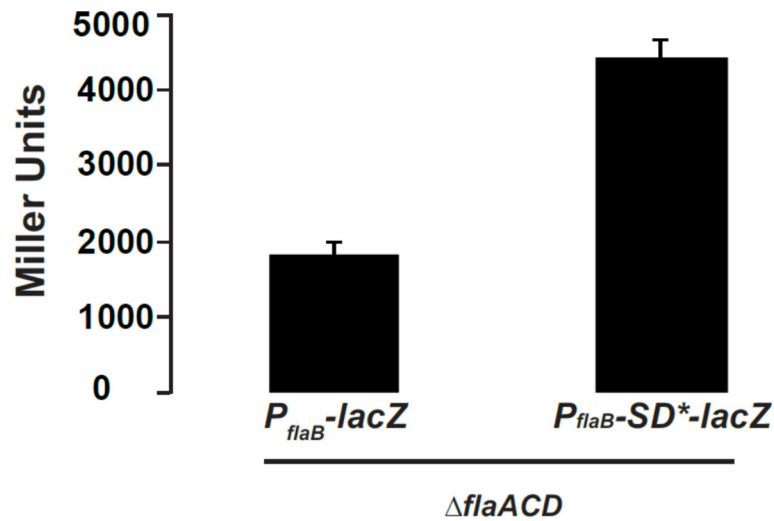

**Figure S6.** Beta galactosidase assay for wild type SD-*flaB* and *fms-6* SD\*-*flaB* in  $\Delta$ *flaACD* mutants.

Expression analysis via b-galactosidase assay for  $P_{flaB}$ -*lacZ* that either includes the wild type Shine Dalgarno or the *fms-6* mutation fused to *lacZ*. Expression analysis was done in the  $\Delta$ *flaACD* parent mutant background from which the *fms-6* suppressor had been isolated. Miller units are the averages for three replicates per strain. Error bars show SEM.



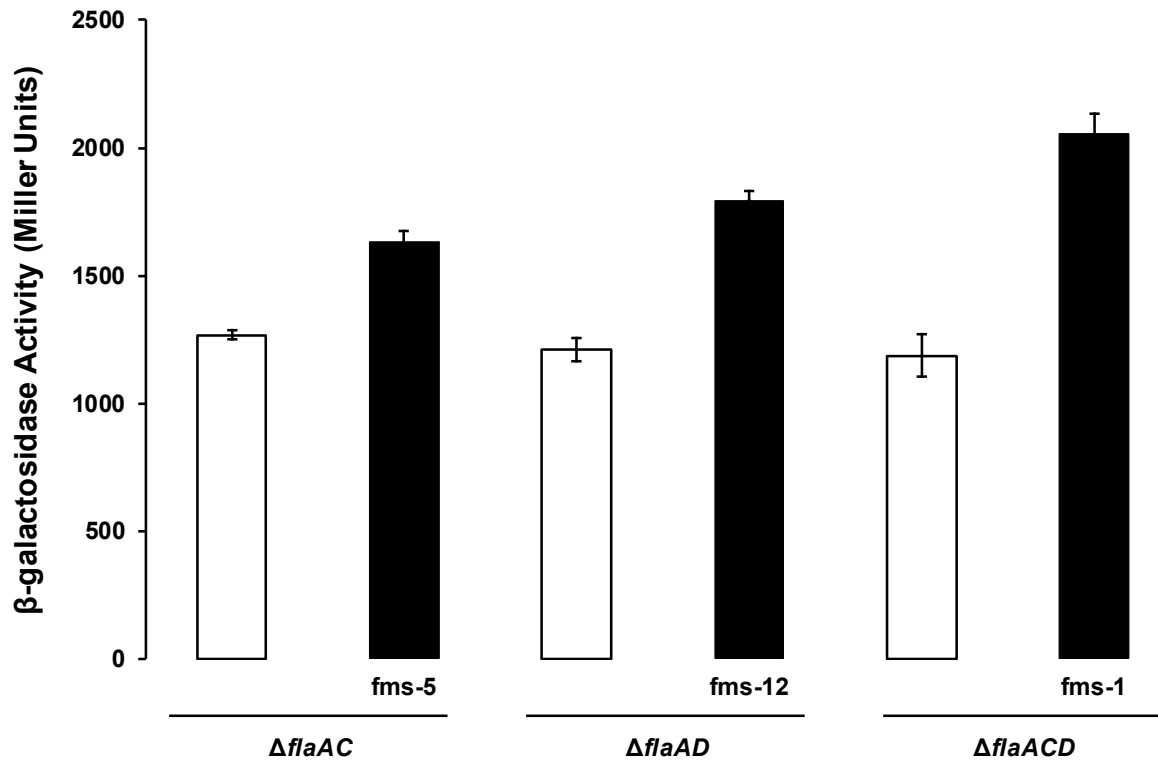

**Figure S7.** Expression of  $P_{flaB}$  in *sciP* fms suppressor mutants.

Expression analysis via β-galactosidase assay for plasmid-borne  $P_{flaB}$ -*lacZ* (pBM196) introduced into the suppressor mutant backgrounds where *sciP* mutations were isolated (solid bars) and their isogenic parents (open bars), as indicated under each data set. The reported Miller units are the averages for five replicates per strain, and error bars are S.E.M.

**Table S1.** Comparison of *A. tumefaciens* flagellin genes

| Protein | Gene <sup>a</sup> | Length (aa) | % Sequence Identity (Conservation) with: |         |         |         |
|---------|-------------------|-------------|------------------------------------------|---------|---------|---------|
|         |                   |             | FlaA                                     | FlaB    | FlaC    | FlaD    |
| FlaA    | Atu0545           | 306         |                                          | 62 (76) | 60 (74) | 54 (69) |
| FlaB    | Atu0543           | 320         |                                          |         | 62 (77) | 55 (70) |
| FlaC    | Atu0542           | 313         |                                          |         |         | 57 (74) |
| FlaD    | Atu0567           | 430         |                                          |         |         |         |

<sup>a</sup> Atu numbers as available through BioCyc database (<https://biocyc.org/>)

**Table S2. Extracted flagellin peptide signals in relative proportions to flagellin FlaB: Mass Spectrometry was conducted for three samples.**

**Comparison of FlaA with FlaB**

| <b>FlaA peptide</b> | Start   | End     | Extracted     | Retention | Sample 1 | Sample 2 | Sample 3 |
|---------------------|---------|---------|---------------|-----------|----------|----------|----------|
| Sequence            | Residue | Residue | m/z range     | Time      | m/z Area | m/z Area | m/z Area |
| SIASDLSTTQDR        | 19      | 30      | 647.22-647.42 | 17.54     | 1.18E+09 | 2.45E+08 | 3.93E+08 |
| VGSASDNAAYWSIATTMR  | 37      | 54      | 950.84-951.04 | 24.82     | 1.92E+08 | 1.71E+07 | 3.19E+07 |
| VDTASAGMDAAIK       | 74      | 86      | 625.21-625.41 | 17.16     | 9.31E+08 | 9.29E+07 | 2.20E+08 |
| IDLQSGFADK          | 244     | 253     | 547.18-547.38 | 19.73     | 1.29E+09 | 8.73E+07 | 2.12E+08 |

| <b>FlaB peptide</b> | Start   | End     | Extracted     | Retention | Sample 1 | Sample 2 | Sample 3 | FlaA:FlaB | FlaA:FlaB | FlaA:FlaB |
|---------------------|---------|---------|---------------|-----------|----------|----------|----------|-----------|-----------|-----------|
| Sequence            | Residue | Residue | m/z range     | Time      | m/z Area | m/z Area | m/z Area | Sample 1  | Sample 2  | Sample 3  |
| SIGQNMESTQAR        | 19      | 30      | 669.21-669.41 | 14.28     | 7.39E+07 | 2.88E+07 | 6.04E+07 | 15.968    | 8.507     | 6.507     |
| VGDASDNAAYWSIATTMR  | 37      | 54      | 964.84-965.04 | 25.1      | 1.03E+08 | 2.50E+07 | 4.88E+07 | 1.864     | 0.684     | 0.654     |
| VDTASAGMSSAIDVVK    | 74      | 89      | 775.79-775.99 | 20.86     | 6.82E+08 | 6.98E+07 | 1.21E+08 | 1.365     | 1.331     | 1.819     |
| IGLQEDFASK          | 258     | 267     | 554.19-554.39 | 19.6      | 9.41E+08 | 1.79E+08 | 3.39E+08 | 1.371     | 0.488     | 0.625     |

**Comparison of FlaB with FlaC**

| <b>FlaB peptide</b> | Start   | End     | Extracted     | Retention | Sample 1 | Sample 2 | Sample 3 |
|---------------------|---------|---------|---------------|-----------|----------|----------|----------|
| Sequence            | Residue | Residue | m/z range     | Time      | m/z Area | m/z Area | m/z Area |
| SIGQNMESTQAR        | 19      | 30      | 669.21-669.41 | 14.28     | 7.39E+07 | 2.88E+07 | 6.04E+07 |
| SDNMA-combo         | 55      | 73      | 903.85-904.05 | 26.43     | 4.36E+08 | 2.14E+08 | 1.39E+08 |
| VDTASAGMSSAIDVVK    | 74      | 89      | 775.79-775.99 | 20.86     | 4.60E+08 | 2.52E+07 | 2.67E+07 |
| LVTATEEGVDR         | 95      | 105     | 595.21-595.41 | 15.09     | 4.97E+08 | 1.49E+08 | 2.13E+08 |
| IGLQEDFASK          | 258     | 267     | 554.19-554.39 | 19.6      | 9.41E+08 | 1.79E+08 | 3.39E+08 |
| SVVAGFVR            | 152     | 159     | 417.64-417.84 | 19.2      | 4.50E+08 | 5.50E+07 | 6.39E+07 |

| <b>FlaC peptide</b> | Start   | End     | Extracted     | Retention | Sample 1 | Sample 2 | Sample 3 | FlaC:FlaB | FlaC:FlaB | FlaC:FlaB |
|---------------------|---------|---------|---------------|-----------|----------|----------|----------|-----------|-----------|-----------|
| Sequence            | Residue | Residue | m/z range     | Time      | m/z Area | m/z Area | m/z Area | Sample 1  | Sample 2  | Sample 3  |
| AISGQLEDTQSR        | 19      | 30      | 652.73-652.93 | 15.04     | 7.29E+07 | 2.47E+07 | 4.56E+07 | 0.985     | 0.856     | 0.754     |
| SDNMA-combo         | 55      | 73      | 916.36-916.56 | 28.55     | 4.43E+07 | 3.84E+07 | 3.00E+07 | 0.101     | 0.180     | 0.216     |
| VDVAYSAMESTVEVVK    | 74      | 89      | 863.83-864.03 | 36.38     | 1.40E+07 | 5.10E+06 | 1.20E+06 | 0.030     | 0.202     | 0.045     |
| IVAATEEGVDK         | 95      | 105     | 680.77-680.97 | 13.46     | 1.13E+07 | 1.16E+07 | 1.26E+07 | 0.023     | 0.078     | 0.059     |
| IGLQEDFVSK          | 250     | 259     | 568.2-568.4   | 20.55     | 9.45E+07 | 2.76E+07 | 3.42E+07 | 0.100     | 0.154     | 0.101     |
| TVVSGFVR            | 141     | 148     | 432.65-432.85 | 18.7      | 9.00E+08 | 6.71E+07 | 2.00E+08 | 2.000     | 1.219     | 3.129     |

**Comparison of FlaB with FlaD**

| <b>FlaB</b>      | Start   | End     | Extracted     | Retention | Sample 1 | Sample 2 | Sample 3 |
|------------------|---------|---------|---------------|-----------|----------|----------|----------|
| Sequence         | Residue | Residue | m/z range     | Time      | m/z Area | m/z Area | m/z Area |
| VDTASAGMSSAIDVVK | 74      | 89      | 775.79-775.99 | 20.86     | 4.60E+08 | 2.52E+07 | 2.67E+07 |
| LVTATEEGVDR      | 95      | 105     | 595.21-595.41 | 15.09     | 4.97E+08 | 1.49E+08 | 2.13E+08 |

| <b>FlaD</b>      | Start   | End     | Extracted     | Retention | Sample 1 | Sample 2 | Sample 3 | FlaD:FlaB | FlaD:FlaB | FlaD:FlaB |
|------------------|---------|---------|---------------|-----------|----------|----------|----------|-----------|-----------|-----------|
| Sequence         | Residue | Residue | m/z range     | Time      | m/z Area | m/z Area | m/z Area | Sample 1  | Sample 2  | Sample 3  |
| VDTAYDALESTIEVVK | 74.00   | 89.00   | 876.85-877.05 | 27.01     | 1.14E+07 | 1.50E+07 | 1.80E+07 | 0.025     | 0.595     | 0.674     |
| LVAAYGVGADR      | 95.00   | 105.00  | 546.2-546.4   | 17.56     | 2.13E+07 | 5.20E+06 | 8.54E+06 | 0.043     | 0.035     | 0.040     |

Table S3. Strains and plasmids used in this study

| Strain or Plasmid             | Relevant feature(s)                                                            | Source or Reference |
|-------------------------------|--------------------------------------------------------------------------------|---------------------|
| <b>A. tumefaciens strains</b> |                                                                                |                     |
| C58                           | Nopaline type strain, pTiC58, pAtC58                                           | (1)                 |
| BM110                         | $\Delta flaB$ C58 derivative                                                   | This study          |
| BM111                         | $\Delta flaD$ C58 derivative                                                   | This study          |
| BM114                         | $\Delta flaD$ , $\Delta flaB$ derivative                                       | This study          |
| BM117                         | $\Delta flaA$ C58 derivative                                                   | This study          |
| BM118                         | $\Delta flaC$ C58 derivative                                                   | This study          |
| BM120                         | $\Delta flaA$ , $\Delta flaC$ derivative                                       | This study          |
| BM121                         | $\Delta flaA$ , $\Delta flaD$ derivative                                       | This study          |
| BM122                         | $\Delta flaC$ , $\Delta flaD$ derivative                                       | This study          |
| BM124                         | $\Delta flaD$ , $\Delta flaA$ $\Delta flaC$ derivative                         | This study          |
| BM126                         | $\Delta flaBC$ , C58 derivative                                                | This study          |
| BM128                         | $\Delta flaBC$ , $\Delta flaD$ derivative                                      | This study          |
| BM129                         | C58 (FlaA T213C), C58 derivative                                               | This study          |
| BM135                         | C58 (FlaD T276C), C58 derivative                                               | This study          |
| BM136                         | $\Delta flaA$ $\Delta flaB$ C58 derivative                                     | This study          |
| BM139                         | $\Delta flaA$ $\Delta flaB$ $\Delta flaC$ , C58 derivative                     | This study          |
| BM140                         | $\Delta flaD$ , $\Delta flaA$ $\Delta flaB$ $\Delta flaC$ derivative           | This study          |
| BM141                         | $\Delta flaD$ , $\Delta flaA$ $\Delta flaB$ derivative                         | This study          |
| BM143                         | C58 (FlaC T216C), C58 derivative                                               | This study          |
| BM149                         | C58 (FlaB T190C), C58 derivative                                               | This study          |
| BM150                         | $\Delta flaA$ , C58 derivative without the base change                         | This study          |
| BM151                         | fms-5 <i>flaD</i> mutation replaced in native $\Delta flaAC$ background        | This study          |
| BM152                         | fms-12 <i>flaB</i> mutation replaced in native $\Delta flaAD$ background       | This study          |
| BM153                         | fms-13 <i>flaB</i> mutation replaced in native $\Delta flaA$ background        | This study          |
| BM154                         | fms-6 SD* + <i>flaB</i> mutation replaced in native $\Delta flaACD$ background | This study          |

|                                                                               |                                                                                                                                             |                         |
|-------------------------------------------------------------------------------|---------------------------------------------------------------------------------------------------------------------------------------------|-------------------------|
| BM157                                                                         | <i>fms-5 flgE</i> mutation replaced in native $\Delta$ <i>flaAC</i> background                                                              | This study              |
| BM158                                                                         | <i>fms-5 flgE and flaD</i> mutation replaced in native $\Delta$ <i>flaAC</i> background                                                     | This study              |
| BM159                                                                         | FlaBT190C replaced in <i>fms-6</i> suppressor                                                                                               | This study              |
| BM160                                                                         | FlaBT190C replaced in <i>fms-2</i> suppressor                                                                                               | This study              |
| BM161                                                                         | FlaBT190C replaced in <i>fms-13</i> suppressor                                                                                              | This study              |
| BM162                                                                         | <i>fms-1 flaB</i> mutation replaced in native $\Delta$ <i>flaACD</i> background                                                             | This study              |
| BM163                                                                         | <i>fms-12 sciP</i> mutation replaced in BM152                                                                                               | This study              |
| BM164                                                                         | <i>fms-1 sciP</i> mutation replaced in BM162                                                                                                | This study              |
| $\Delta$ <i>flaA</i> $\Delta$ <i>flaC</i> $\Delta$ <i>flaD</i> , <i>fms-1</i> | Spontaneous suppressor of $\Delta$ <i>flaA</i> $\Delta$ <i>flaC</i> $\Delta$ <i>flaD</i>                                                    | This study              |
| $\Delta$ <i>flaA</i> $\Delta$ <i>flaC</i> , <i>fms-2</i>                      | Spontaneous suppressor of $\Delta$ <i>flaA</i> $\Delta$ <i>flaC</i>                                                                         | This study              |
| $\Delta$ <i>flaA</i> $\Delta$ <i>flaC</i> , <i>fms-5</i>                      | Spontaneous suppressor of $\Delta$ <i>flaA</i> $\Delta$ <i>flaC</i>                                                                         | This study              |
| $\Delta$ <i>flaA</i> $\Delta$ <i>flaC</i> $\Delta$ <i>flaD</i> , <i>fms-6</i> | Spontaneous suppressor of $\Delta$ <i>flaA</i> $\Delta$ <i>flaC</i> $\Delta$ <i>flaD</i>                                                    | This study <sup>i</sup> |
| $\Delta$ <i>flaA</i> $\Delta$ <i>flaD</i> , <i>fms-12</i>                     | Spontaneous suppressor of $\Delta$ <i>flaA</i> $\Delta$ <i>flaD</i>                                                                         | This study              |
| $\Delta$ <i>flaA</i> , <i>fms-13</i>                                          | Spontaneous suppressor of $\Delta$ <i>flaA</i>                                                                                              | This study              |
| <b><i>E. coli</i> strains</b>                                                 |                                                                                                                                             |                         |
| DH5 $\alpha$ $\lambda$ <i>pir</i>                                             | Cloning host                                                                                                                                | (2)                     |
| S17-1 $\lambda$ <i>pir</i>                                                    | Cloning host                                                                                                                                | (3)                     |
| TOP10 F'                                                                      | Cloning host                                                                                                                                | Invitrogen              |
| Plasmids                                                                      |                                                                                                                                             |                         |
| pGEM-T Easy                                                                   | PCR cloning vector; Amp <sup>r</sup>                                                                                                        | Promega                 |
| pNPTS138                                                                      | colE1 origin; <i>sacB</i> ; Km <sup>r</sup>                                                                                                 | gift of M. Alley        |
| pRK2013                                                                       | Self transmissible tra <sup>+</sup> , helper                                                                                                | (4)                     |
| pRK2073                                                                       | Self transmissible tra <sup>+</sup> , helper                                                                                                | (5)                     |
| pSRKKm                                                                        | Broad host range P <sub>lac</sub> expression vector; <i>lacI<sup>q</sup></i> ; <i>lacZ<math>\alpha</math><sup>+</sup></i> ; Km <sup>r</sup> | (6)                     |
| pRA301                                                                        | Broad host range; Promoterless <i>lacZ</i> ; Sp <sup>r</sup>                                                                                | (7)                     |

|        |                                                                                    |            |
|--------|------------------------------------------------------------------------------------|------------|
| pBM120 | pGEM-T Easy carrying <i>flaB</i> deletion construct                                | This study |
| pBM121 | pGEM-T Easy carrying <i>flaD</i> deletion construct                                | This study |
| pBM122 | pNPTS138 carrying <i>flaB</i> deletion construct                                   | This study |
| pBM123 | pNPTS138 carrying <i>flaD</i> deletion construct                                   | This study |
| pBM126 | pNPTS138 carrying <i>flaA</i> deletion construct                                   | This study |
| pBM127 | pGEM-T Easy carrying <i>flaC</i> deletion construct                                | This study |
| pBM128 | pGEM-T Easy carrying <i>flaD</i> for complementation                               | This study |
| pBM129 | pNPTS138 carrying <i>flaC</i> deletion construct                                   | This study |
| pBM136 | pGEM-T Easy carrying <i>flaABC</i> deletion construct                              | This study |
| pBM138 | pNPTS138 carrying <i>flaABC</i> deletion construct                                 | This study |
| pBM140 | pGEM-T Easy carrying <i>flaA</i> T213C for allelic replacement and complementation | This study |
| pBM143 | pSRKKm $P_{lac}$ - <i>flaA</i> T213C                                               | This study |
| pBM145 | pNPTS138 carrying <i>flaA</i> T213C for allelic replacement                        | This study |
| pBM147 | pGEM-T Easy carrying <i>flaC</i> for complementation                               | This study |
| pBM149 | pNPTS138 carrying <i>flaD</i> T276C for allelic replacement                        | This study |
| pBM150 | pGEM-T Easy carrying <i>flaAB</i> deletion construct                               | This study |
| pBM152 | pNPTS138 carrying <i>flaAB</i> deletion construct                                  | This study |
| pBM154 | pSRKKm $P_{lac}$ - <i>flaD</i>                                                     | This study |
| pBM157 | pGEM-T Easy carrying <i>flaABC</i> deletion construct                              | This study |
| pBM158 | pNPTS138 carrying <i>flaABC</i> deletion construct                                 | This study |
| pBM161 | pSRKKm $P_{lac}$ - <i>flaC</i>                                                     | This study |
| pBM165 | pNPTS138 carrying <i>flaC</i> T216C for allelic replacement                        | This study |
| pBM173 | pSRKKm $P_{lac}$ - <i>flaA</i>                                                     | This study |
| pBM181 | pGEM-T Easy carrying $P_{flaA}$ + <i>flaA</i>                                      | This study |

---

|                  |                                                                                                                                  |            |
|------------------|----------------------------------------------------------------------------------------------------------------------------------|------------|
| pBM183<br>pBM185 | pSRKKm $P_{lac}$ - $P_{flaA}$ - <i>flaA</i><br>pGEM-T Easy carrying <i>flaCT216C</i> for allelic replacement and complementation | This study |
| pBM186           | pGEM-T Easy carrying <i>flaDT276C</i> for allelic replacement and complementation                                                | This study |
| pBM187           | pGEM-T Easy carrying <i>flaBT190C</i> for allelic replacement and complementation                                                | This study |
| pBM188           | pSRKKm - $P_{lac}$ - <i>flaCT216C</i>                                                                                            | This study |
| pBM189           | pSRKKm - $P_{lac}$ - <i>flaDT276C</i>                                                                                            | This study |
| pBM190           | pSRKKm - $P_{lac}$ - <i>flaBT190C</i>                                                                                            | This study |
| pBM192           | pNPTS138 carrying <i>flaBT190C</i> for allelic replacement                                                                       | This study |
| pBM193           | pGEM-T Easy carrying $P_{flaB}$                                                                                                  | This study |
| pBM195           | pGEM-T Easy carrying <i>fms-6</i> $P_{flaB}$                                                                                     | This study |
| pBM196           | pRA301- $P_{flaB}$ - <i>lacZ</i>                                                                                                 | This study |
| pBM198           | pRA301- <i>fms-6</i> $P_{flaB}$ - <i>lacZ</i>                                                                                    | This study |
| pBM199           | pGEM-T Easy carrying $P_{flaA}$ - <i>flaAT213C</i> for complementation                                                           | This study |
| pBM205           | pSRKKm $P_{lac}$ - $P_{flaA}$ <i>flaAT213C</i>                                                                                   | This study |
| pBM207           | pGEM-T Easy carrying <i>fms-6</i> (US of <i>flaB</i> + <i>flaB</i> ) fragment for allelic replacement                            | This study |
| pBM208           | pGEM-T Easy carrying <i>fms-5</i> ( <i>flaD</i> ) fragment for allelic replacement                                               | This study |
| pBM209           | pGEM-T Easy carrying <i>fms-5</i> ( <i>flgE</i> ) fragment for allelic replacement                                               | This study |
| pBM210           | pGEM-T Easy carrying <i>fms-12</i> ( <i>flaB</i> ) fragment for allelic replacement                                              | This study |
| pBM211           | pGEM-T Easy carrying <i>fms-13</i> ( <i>flaB</i> ) fragment for allelic replacement                                              | This study |

---

---

|        |                                                                                                    |            |
|--------|----------------------------------------------------------------------------------------------------|------------|
| pBM214 | pNPTS138 carrying <i>fms-5</i> ( <i>flaD</i> ) fragment for allelic replacement                    | This study |
| pBM215 | pNPTS138 carrying <i>fms-5</i> ( <i>flgE</i> ) fragment for allelic replacement                    | This study |
| pBM216 | pNPTS138 carrying <i>fms-12</i> ( <i>flaB</i> ) fragment for allelic replacement                   | This study |
| pBM217 | pNPTS138 carrying <i>fms-13</i> ( <i>flaB</i> ) fragment for allelic replacement                   | This study |
| pBM219 | pGEM-T Easy carrying <i>flaA</i> deletion fragment                                                 | This study |
| pBM221 | pNPTS138 carrying <i>flaA</i> deletion construct                                                   | This study |
| pBM222 | pSRKKm $P_{lac}$ - <i>flaB</i>                                                                     | This study |
| pBM223 | pNPTS138 carrying <i>fms-6</i> (US of <i>flaB</i> + <i>flaB</i> ) fragment for allelic replacement | This study |
| pBM225 | pGEM-T Easy carrying <i>flaBT190C</i> for allelic replacement in <i>fms-13</i>                     | This study |
| pBM227 | pNPTS138 - <i>flaBT190C</i> for allelic replacement in <i>fms-13</i>                               | This study |
| pBM228 | pGEMT-Easy carrying $P_{flaA}$ - <i>flaBT190C</i> for complementation                              | This study |
| pBM230 | pSRKKm - $P_{lac}$ - $P_{flaA}$ - <i>flaBT190C</i>                                                 | This study |
| pBM232 | pGEM-T Easy carrying <i>fms-1</i> Y129N for allelic replacement                                    | This study |
| pBM233 | pNPTS138 carrying <i>fms-1</i> Y129N for allelic replacement                                       | This study |
| pBM234 | pGEM-T Easy carrying $P_{flaA}$ - <i>flaBY129N+T190C</i> for complementation                       | This study |
| pBM236 | pSRKKm - $P_{lac}$ - $P_{flaA}$ - <i>flaBY129N+T190C</i> for complementation                       | This study |
| pBM237 | pGEM-T Easy carrying <i>Atu2430 C181T</i> fragment for allelic replacement                         | This study |

---



---

|        |                                                                                                               |            |
|--------|---------------------------------------------------------------------------------------------------------------|------------|
| pBM238 | pGEM-T Easy carrying Atu2430 G229C fragment for allelic replacement                                           | This study |
| pBM239 | pNPTS138 carrying Atu2430 C181T fragment for allelic replacement                                              | This study |
| pBM240 | pNPTS138 carrying Atu2430 G229C fragment for allelic replacement                                              | This study |
| pBM243 | pGEM-T Easy carrying P <sub>flaB</sub> -SD*- <i>flaBY</i> 129N+T190C for complementation                      | This study |
| pBM244 | pGEM-T Easy carrying P <sub>flaB</sub> -SD*- <i>flaBT</i> 190C for complementation                            | This study |
| pBM246 | pSRKKm - P <sub>lac</sub> - P <sub>flaB</sub> - SD*- <i>flaBT</i> 190C for complementation                    | This study |
| pBM251 | pGEM-T Easy carrying P <sub>flaB</sub> - <i>flaBY</i> 129N+T190C for complementation                          | This study |
| pBM253 | pSRKKm - P <sub>lac</sub> - P <sub>flaB</sub> - <i>flaBY</i> 129N+T190C for complementation                   | This study |
| pBM254 | pSRKKm - P <sub>lac</sub> - P <sub>flaB</sub> - SD <sub>2</sub> - <i>flaBY</i> 129N+T190C for complementation | This study |
| pBM256 | pGEM-T Easy carrying P <sub>flaA</sub> - <i>flaAN</i> 129Y+T213C for complementation                          | This study |
| pBM257 | pGEM-T Easy carrying P <sub>flaB</sub> - <i>flaBT</i> 190C for complementation                                | This study |
| pBM258 | pSRKKm - P <sub>lac</sub> - P <sub>flaA</sub> - <i>flaAN</i> 129Y+T213C for complementation                   | This study |
| pBM259 | pSRKKm - P <sub>lac</sub> - P <sub>flaB</sub> - <i>flaBT</i> 190C for complementation                         | This study |

---

TABLE S4. Primers used in this study

| Primer  | Sequence                                                  | Use                                      |
|---------|-----------------------------------------------------------|------------------------------------------|
| flaA P1 | actagt GCATGATGATGCTGCCGC                                 | P1 for <i>flaA</i> SOE deletion fragment |
| flaA P2 | AAGCTTGGTACCGAATTC GTT GTT<br>GGT CAG AAT GCT TGC CAT     | P2 for <i>flaA</i> SOE deletion fragment |
| flaA P3 | GAA TTC GGT ACC AAG CTT<br>CTCTTCCGCTAAGAGCCGAGC          | P3 for <i>flaA</i> SOE deletion fragment |
| flaA P4 | gcatgc CCT GGG TGG ATT CCA TGT<br>TCT GGC                 | P4 for <i>flaA</i> SOE deletion fragment |
| flaB P1 | actagt GCT CTG ACG AAG ATG ACC<br>AGC                     | P1 for <i>flaB</i> SOE deletion fragment |
| flaB P2 | AAGCTTGGTACCGAATTC GAT AAT<br>GCT CGT CAT AGT AGT GTG CCC | P2 for <i>flaB</i> SOE deletion fragment |
| flaB P3 | GAATTCGGTACCAAGCTT TCG CTC<br>TTC CGT TAA TCG AAA GCT     | P3 for <i>flaB</i> SOE deletion fragment |
| flaB P4 | gcatgc GTC GAC ACC CTC TTC GGT<br>TGC                     | P4 for <i>flaB</i> SOE deletion fragment |
| flaC P1 | actagt CTTCCAAGCTGTCCGACTCCG                              | P1 for <i>flaC</i> SOE deletion fragment |
| flaC P2 | AAGCTTGGTACCGAATTC ACT TGT<br>CAT AAT TGC CCC TCT GAG CTG | P2 for <i>flaC</i> SOE deletion fragment |
| flaC P3 | GAA TTC GGT ACC AAG CTT TC GCT<br>ATT CCG CCA GTA AGC G   | P3 for <i>flaC</i> SOE deletion fragment |
| flaC P4 | gcatgc GCC CGA ACC TGC TGT TTG<br>C                       | P4 for <i>flaC</i> SOE deletion fragment |
| flaD P1 | actagt CTC GAT CTC GAA CTC AAG<br>CCG                     | P1 for <i>flaD</i> SOE deletion fragment |
| flaD P2 | AAGCTTGGTACCGAATTC GCT TGT<br>CAT GGG GTC CAC             | P2 for <i>flaD</i> SOE deletion fragment |
| flaD P3 | GAATTCGGTACCAAGCTT CAG CTC<br>TTC AAG TAA CGG GTT TCG     | P3 for <i>flaD</i> SOE deletion fragment |
| flaD P4 | gggccc ATC GAT ACC TTC ACG CAG<br>ACG                     | P4 for <i>flaD</i> SOE deletion fragment |

---

|                             |                                                                           |                                                                                                                 |
|-----------------------------|---------------------------------------------------------------------------|-----------------------------------------------------------------------------------------------------------------|
| flaB P2-2                   | AGC TTT CGA TTA ACG GAA GAG<br>CGA GAT AAT GCT CGT CAT AGT<br>AGT GTG CCC | P2 for <i>flaB</i> SOE<br>deletion fragment<br>for creating $\Delta$ <i>flaAB</i><br>and $\Delta$ <i>flaABC</i> |
| flaB P3-2                   | GGG CAC ACT ACT ATG ACG AGC<br>ATT ATC TCG CTC TTC CGT TAA<br>TCG AAA GCT | P3 for <i>flaB</i> SOE<br>deletion fragment<br>for creating $\Delta$ <i>flaAB</i><br>and $\Delta$ <i>flaABC</i> |
| flaC P2-2                   | CGC TTA CTG GCG GAA TAG CGA<br>ACT TGT CAT AAT TGC CCC TCT<br>GAG CTG     | P2 for <i>flaC</i> SOE<br>deletion fragment<br>for creating $\Delta$ <i>flaAB</i><br>and $\Delta$ <i>flaABC</i> |
| flaC P3-2                   | CAG CTC AGA GGG GCA ATT ATG<br>ACA AGT TCG CTA TTC CGC CAG<br>TAA GCG     | P3 for <i>flaC</i> SOE<br>deletion fragment<br>for creating $\Delta$ <i>flaAB</i><br>and $\Delta$ <i>flaABC</i> |
| fms-2/fms-6 AR P1           | actagt CGG GTT TGG TTT CTG GAA<br>CTA AGC                                 | P1 for allelic<br>replacement of<br>fms-2/ fms-6<br>mutated allele                                              |
| fms-2/fms-6 AR P2           | gcatgc GCG TAT TTC GTG GTC GTA<br>ACG                                     | P2 for allelic<br>replacement of<br>fms-2/ fms-6<br>mutated allele                                              |
| fms-5 ( <i>flaD</i> ) AR P1 | actagt TGC CGG TTT ATG CGA AAC<br>CCG                                     | P1 for allelic<br>replacement of<br>fms-5 ( <i>flaD</i> )<br>mutated allele                                     |
| fms-5 ( <i>flaD</i> ) AR P2 | gcatgc GAG GGA ACG ATT GGC AGA<br>AGC                                     | P2 for allelic<br>replacement of<br>fms-5 ( <i>flaD</i> )<br>mutated allele                                     |
| fms-12 AR P1                | actagt AAG GTT CAG GAA GAA ATC<br>GGC                                     | P1 for allelic<br>replacement of<br>fms-12 mutated<br>allele                                                    |
| fms-12 AR P2                | gcatgc GCG GAG AGA GCC ATG TTG<br>TCG                                     | P2 for allelic<br>replacement of<br>fms-12 mutated<br>allele                                                    |

---

---

|                             |                                            |                                                                    |
|-----------------------------|--------------------------------------------|--------------------------------------------------------------------|
| fms-13 AR P1                | actagt GATCCATTTCTTCCCACAAGC               | P1 for allelic replacement of fms-13 mutated allele                |
| fms-13 AR P2                | gcatgc GCC TTA AGC GAG TTT TCA ACC AGC     | P2 for allelic replacement of fms-13 mutated allele                |
| fms-1 AR P1                 | actagt CCTAATGCTCATCGAAACGGC               | P1 for allelic replacement of fms-1 mutated allele                 |
| fms-1 AR P2                 | gcatgc ACA GGA TGC TTT CGG AGT TGC         | P2 for allelic replacement of fms-1 mutated allele                 |
| Atu2430 AR P1               | actagt TCTCGTCATGCTGTCACTGGC               | P1 for allelic replacement of Atu2430 mutated allele               |
| Atu2430 AR P2               | gcatgc TCT ACT CTC AGA CAG AGG ATA GCG     | P2 for allelic replacement of Atu2430 mutated allele               |
| fms-5 ( <i>flgE</i> ) AR P1 | actagt ATT TCT ACT ACA CCA AGA CCG GCG     | P1 for allelic replacement of fms-5 ( <i>flgE</i> ) mutated allele |
| fms-5 ( <i>flgE</i> ) AR P2 | gcatgc CTT GAG CAG TTC TTT CAT ATA GTT GGC | P2 for allelic replacement of fms-5 ( <i>flgE</i> ) mutated allele |
| flaBT190C AR P1             | actagt CTT CCG TTT CCG ACG CTC TCG         | For allelic replacement of FlaBT190C mutated allele in fms-13      |
| flaBT190C AR P2             | gcatgc GGA AAC GAC TGA GCG GCT TGA TGC     | For allelic replacement of FlaBT190C                               |

---

---

|                              |                                                                           |                                                                                                                       |
|------------------------------|---------------------------------------------------------------------------|-----------------------------------------------------------------------------------------------------------------------|
|                              |                                                                           | mutated allele in<br>fms-13                                                                                           |
| PflaB +flaB - P1             | <i>ggcagc</i> actagt <b>TGA</b> GGC CTT ATC TTT<br>TTT TTA AAC TTT TGC    | For cloning <i>flaB</i><br>along with its<br>native promoter                                                          |
| flaA N129Y<br>mutagenic - P2 | CGA TCG GCA CGA GCG CGT CTT<br>TCI ACG GTG AAA ACT GGC TCG<br>TTT CCA     | Forward<br>mutagenic primer                                                                                           |
| flaA N129Y<br>mutagenic - P3 | TGG AAA CGA GCC AGT TTT CAC<br>CGT AGA AAG ACG CGC TCG TGC<br>CGA TCG     | Reverse<br>mutagenic primer                                                                                           |
| (PflaB+flaB) wt - P2         | GAC ATT CGT GAT AAT GCT CGT<br>CAT AGT AGT GTG CCC CTT GAA<br>TGG CTG ATT | Reverse primer for<br>amplifying across<br>the Shine<br>Dalgarno of <i>flaB</i> –<br>FlaB coding<br>sequence junction |
| (PflaB+flaB) wt - P3         | AAT CAG CCA TTC AAG GGG CAC<br>ACT ACT ATG ACG AGC ATT ATC<br>ACG AAT GTC | Forward primer for<br>amplifying across<br>the Shine<br>Dalgarno of <i>flaB</i> –<br>FlaB coding<br>sequence junction |
| (PflaB+flaB) fms-6 -<br>P2   | GAC ATT CGT GAT AAT GCT CGT<br>CAT AGT AGT GTG CCI CTT GAA<br>TGG CTG ATT | Reverse primer for<br>amplifying across<br>the Shine<br>Dalgarno of <i>flaB</i> –<br>FlaB coding<br>sequence junction |
| (PflaB+flaB) fms-6 -<br>P3   | AAT CAG CCA TTC AAG AGG CAC<br>ACT ACT ATG ACG AGC ATT ATC<br>ACG AAT GTC | Forward primer for<br>amplifying across<br>the Shine<br>Dalgarno of <i>flaB</i> –<br>FlaB coding<br>sequence junction |
| flaA T213C<br>mutagenic F    | CGACATGAACGTCGGCTIGTGACGAC<br>CTCGACAACGC                                 | Reverse<br>mutagenic primer                                                                                           |

---

---

|                           |                                                                     |                                                          |
|---------------------------|---------------------------------------------------------------------|----------------------------------------------------------|
| flaA T213C<br>mutagenic R | GCG TTG TCG AGG TCG TCA <u>CAG</u><br>CCG ACG TTC ATG TCG           | Forward<br>mutagenic primer                              |
| flaB T190C<br>mutagenic F | CGG TTC GGT CGA CGG <u>TTG TGG</u><br>CAC TCC CGA CGC               | Reverse<br>mutagenic primer                              |
| flaB T190C<br>mutagenic R | GCG TCG GGA GTG CCA <u>CAA</u> CCG<br>TCG ACC GAA CCG               | Forward<br>mutagenic primer                              |
| flaC T216C<br>mutagenic F | GCTGTTCAATTCTGCA <u>TGTC</u> CGCCGA<br>CCTACACCATCG                 | Reverse<br>mutagenic primer                              |
| flaC T216C<br>mutagenic R | CGA TGG TGT AGG TCG GCG <u>GAC</u><br><u>ATG</u> CAG AAT TGA ACA GC | Forward<br>mutagenic primer                              |
| flaD T276C<br>mutagenic F | CGT CTA GCG GCG GCT <u>GTA</u> CCG<br>TTT CCC CTG C                 | Reverse<br>mutagenic primer                              |
| flaD T276C<br>mutagenic R | GCA GGG GAA ACG GTA <u>CAG</u> CCG<br>CCG CTA GAC G                 | Forward<br>mutagenic primer                              |
| flaA comp P1              | <i>ggcagc</i> catatg GCA AGC ATT CTG<br>ACC AAC AAC                 | <i>flaA</i> cloning                                      |
| flaA comp P2              | <i>tctaga</i> ggtacc TTA GCG GAA GAG CGA<br>CAG GAT                 | <i>flaA</i> cloning                                      |
| flaB comp P1              | <i>ggcagc</i> catatg ACG AGC ATT ATC ACG<br>AAT GTC                 | <i>flaB</i> cloning                                      |
| flaB comp P2              | <i>tctaga</i> ccgctg TTA ACG GAA GAG<br>CGA CAG GAT                 | <i>flaB</i> cloning                                      |
| flaB comp P2- 2           | <i>tctaga</i> gctagc TTA ACG GAA GAG<br>CGA CAG GAT                 | <i>flaB</i> cloning along<br>with its native<br>promoter |
| flaC comp P1              | <i>ggcagc</i> catatg ACA AGT ATT CTG ACG<br>AAC ACC                 | <i>flaC</i> cloning                                      |
| flaC comp P2              | <i>tctaga</i> ggtacc TTA CTG GCG GAA TAG<br>CGA CAG                 | <i>flaC</i> cloning                                      |
| flaD comp P1              | <i>ggcagc</i> catatg ACA AGC ATT TTG ACC<br>AAT GCG                 | <i>flaD</i> cloning                                      |
| flaD comp P2              | <i>tctaga</i> ggtacc TTA CTT GAA GAG CTG<br>GAG GAT ATT             | <i>flaD</i> cloning                                      |
| PflaA+flaA P1             | <i>ggcagc</i> actagt <b>TGA</b><br>CGGCCCTTATACCCCGCT               |                                                          |

---

---

|                    |                                                     |                                                              |
|--------------------|-----------------------------------------------------|--------------------------------------------------------------|
|                    |                                                     | <i>flaA</i> cloning along with its native promoter           |
| PflaB-lacZ P1      | <i>gagctc</i> ggtacc CTC TTC CGC TAA<br>GAG CCG AGC | Forward cloning promoter of <i>flaB</i> fused to <i>lacZ</i> |
| PflaB-lacZ P2      | <i>ctgcag</i> gcatgc CAT GTT CTG GCC<br>GAT AGA GCG | Reverse cloning promoter of <i>flaB</i> fused to <i>lacZ</i> |
| <i>flaA</i> seq F1 | TGC GAA ATT CTT CCC ACA CGC<br>AGC                  | Sequencing primer for <i>flaA</i> locus                      |
| <i>flaA</i> seq F2 | CCGCCATCAAGGTCGTGACCG                               | Sequencing primer for <i>flaA</i> locus                      |
| <i>flaA</i> seq R1 | CGC TGG TCA TCT TCG TCA GAG<br>CG                   | Sequencing primer for <i>flaA</i> locus                      |
| <i>flaA</i> seq R2 | ATA AGG CCG CAT CCG TTT CCG                         | Sequencing primer for <i>flaA</i> locus                      |
| <i>flaB</i> seq F1 | CCGACAACATGGCTCTCTCTTCCG                            | Sequencing primer for <i>flaB</i> locus                      |
| <i>flaB</i> seq R1 | AAC GGA AGA GCG ACA GGA TGC                         | Sequencing primer for <i>flaB</i> locus                      |
| <i>flaB</i> seq F2 | CGGAAACGGATGCGGCCTTAT                               | Sequencing primer for <i>flaB</i> locus                      |
| <i>flaB</i> seq F3 | CAG AAG CAG CTC GCA TCG ATC<br>TCG                  | Sequencing primer for <i>flaB</i> locus                      |
| <i>flaB</i> seq R3 | CGA GAT CGA TGC GAG CTG CTT<br>CTG                  | Sequencing primer for <i>flaB</i> locus                      |
| <i>flaC</i> seq F1 | GAA GTC GTC AAG GAA ATC AAG<br>TCG                  | Sequencing primer for <i>flaC</i> locus                      |
| <i>flaC</i> seq R1 | ATA TTC TGT TGC TGC CAG AGC                         | Sequencing primer for <i>flaC</i> locus                      |
| <i>flaC</i> seq F2 | AGA GTT CAT TAA CCA AAT CAC<br>GGC                  | Sequencing primer for <i>flaC</i> locus                      |
| <i>flaC</i> seq R2 | CCC ACT GGA TGA AGA ATA TCG                         | Sequencing primer for <i>flaC</i> locus                      |
| <i>flaC</i> seq R3 | GCC GTG ATT TGG TTA ATG AAC<br>TCT                  | Sequencing primer for <i>flaC</i> locus                      |

---

---

|                  |                                        |                                         |
|------------------|----------------------------------------|-----------------------------------------|
| flaD seq F1      | GCA TCC TTC ACC AGG ACC GGC            | Sequencing primer for <i>flaD</i> locus |
| flaD seq R1      | CCT TGT CGA TCA CAT CCA TCA<br>AGC TCG | Sequencing primer for <i>flaD</i> locus |
| flaD seq F2      | TGT CAT CGG GCT TTC GTG TCG            | Sequencing primer for <i>flaD</i> locus |
| flaD seq R2      | CTG ACA AAA ACG GCG TTC TTA<br>TCG     | Sequencing primer for <i>flaD</i> locus |
| flgE seq F1      | CGA GCC AGA TCA AGG ATG TCG            | Sequencing primer for <i>flgE</i> locus |
| flgE seq R2      | GGT TCG CTT GAC GTA GTT CGC            | Sequencing primer for <i>flgE</i> locus |
| flgE seq F2      | GAACGCTGCTGGCTTCCAGC                   | Sequencing primer for <i>flgE</i> locus |
| flgE seq reverse | GTCGTGAGCTTGGTGGC                      | Sequencing primer for <i>flgE</i> locus |
| flaF seq F1      | GTCGCCATGAAGTCGGTGACG                  | Sequencing primer for <i>flaF</i> locus |
| flaF seq R1      | CGC TTC AGT TCC GCC AGA ATC<br>TCG     | Sequencing primer for <i>flaF</i> locus |
| flbT seq F1      | GAGGCAAGGGACTCCTCTTCG                  | Sequencing primer for <i>flbT</i> locus |
| flbT seq R1      | GGT GGG TGT TGG TCT TGA TCG            | Sequencing primer for <i>flbT</i> locus |
| flbT seq F2      | GAA TGT ACC AGT TTT CCT ACG<br>CCG     | Sequencing primer for <i>flbT</i> locus |
| flbT seq R2      | TGT AGC AGC ACT TTA TCA CCG            | Sequencing primer for <i>flbT</i> locus |
| Atu2430 seq F1   | CGACCTGCTTAGGCAATTTTTAAAGG<br>TACG     | Sequencing primer for Atu2430 locus     |
| Atu2430 seq R1   | GCT ATT CGT TTT TTC CAA TGT AAC<br>GGC | Sequencing primer for Atu2430 locus     |
| Atu2430 seq R2   | AGG TCA TCT GGG CCT TGT GGC            | Sequencing primer for Atu2430 locus     |
| Atu0544 seq F1   | AGA GTC CAC CAA GCT GAA GGC            | Sequencing primer for Atu0544 locus     |

---



|                |                                    |                                     |
|----------------|------------------------------------|-------------------------------------|
| Atu0544 seq R1 | CGA GCT CAT ACC GGC GGA AGC        | Sequencing primer for Atu0544 locus |
| Atu0544 seq R2 | CGT TAG CTC GCC GTT TCG ATG<br>AGC | Sequencing primer for Atu0544 locus |
| pUC/M13F       | CGCCAGGGTTTTCCCAGTCACGAC           | pGEM-T Easy and pNPTS138 sequencing |
| pUC/M13R       | TCACACAGGAAACAGCTATGAC             | pGEM-T Easy and pNPTS138 sequencing |
| JEH89          | GCG TTG GCC GAT TCA TTA ATG CA     | pSRKKm sequencing                   |
| JEH90          | GTC AAT TAT TAC CTC CAC GGG GA     | pSRKKm sequencing                   |

Lowercase indicates engineered restriction sites.

Italics indicate overlapping sequences for respective P2/P3 primers used to generate SOE deletion fragments.

Lowercase italics indicate protector sequences added for ease of direct cloning to pSRKKm.

seq refers to sequencing primers.

Underline indicates the base mutagenized via site-directed mutagenesis.

Artificial stop codons highlighted in yellow.

P1 = forward primer, P2 = reverse primer, P3 = forward primer, P4 = reverse primer, F = forward primer and R = reverse primer, unless mentioned otherwise.

## REFERENCES

1. Watson B, Currier TC, Gordon MP, Chilton MD, Nester EW. 1975. Plasmid required for virulence of *Agrobacterium tumefaciens*. *Journal of Bacteriology* 123:255-264.
2. Chiang SLR, E. J. 2002. Construction of a mariner-based transposon for epitope-tagging and genomic targeting. *Gene* 296:179-185.
3. De Lorenzo V, Timmis KN. 1994. Analysis and construction of stable phenotypes in gram-negative bacteria with Tn5- and Tn10-derived minitransposons, p 386-405. *In* Clark VL, Bavoil PM (ed), *Methods in Enzymology; Bacterial pathogenesis, Part A: Identification and regulation of virulence factors*, vol 235.
4. Figurski DH, Helinski DR. 1979. Replication of an origin-containing derivative of plasmid RK2 dependent on a plasmid function provided in trans. *Proceedings of the National Academy of Sciences of the United States of America* 76:1648-1652.
5. Ditta G. 1986. TN5 mapping of *Rhizobium* nitrogen-fixation genes. *Methods in Enzymology* 118:519-528.
6. Khan SR, Gaines J, Roop RM, II, Farrand SK. 2008. Broad-host-range expression vectors with tightly regulated promoters and their use to examine the influence of TraR and TraM expression on Ti plasmid quorum sensing. *Applied and Environmental Microbiology* 74:5053-5062.
7. Akakura RW, S. C. 2002. Mutations in the occQ operator that decrease OccR-induced DNA bending do not cause constitutive promoter activity. *Journal of Biological Chemistry* 277:15773-15780.
